# Supplementary material
Source: MDPI journal article supplement (https://www.mdpi.com/2073-4344/12/5/460)
Supplement: s1 [file s1 › catalysts-1657875-SI.pdf]

## Supplementary Material

# **Towards the Efficient Catalytic Valorization of Chitin to *N*-Acylethanolamine over Ni/CeO<sub>2</sub> Catalyst: Exploring the Shape-Selective Reactivity**

**Yifan Zheng<sup>1</sup>, Lijun Lu<sup>1</sup>, Wei Chen<sup>2</sup>, Anmin Zheng<sup>2,\*</sup>, Aiwen Lei<sup>1,3,\*</sup> and Abhishek Dutta Chowdhury<sup>1,\*</sup>**

<sup>1</sup> The Institute for Advanced Studies (IAS), Wuhan University, Wuhan 430072, Hubei, China; 2019206490033@whu.edu.cn (Y.Z.); ljlu@whu.edu.cn (L.L.)

<sup>2</sup> State Key Laboratory of Magnetic Resonance and Atomic and Molecular Physics, Innovation Academy for Precision Measurement Science and Technology, Chinese Academy of Sciences, Wuhan 430071, China; chenwei@wipm.ac.cn

<sup>3</sup> National Research Center for Carbohydrate Synthesis, Jiangxi Normal University, Nanchang 330022, China

\* Correspondence: zhenganm@wipm.ac.cn (A.Z.); aiwenlei@whu.edu.cn (A.L.); abhishek@whu.edu.cn (A.D.C.)

## Additional Discussion Section: Computational Analysis

To further understand the role of Ni in Ni/CeO<sub>2</sub> catalyst, the single-atom Ni was introduced into the (110) surfaces of CeO<sub>2</sub>, and the introduced Ni was tightly bonded by four planar oxygen atoms, and four short Ni-O bonds of 1.90 Å are smaller than the covalent radius of 1.94 Å as displayed in Figure S6a-7b, which indicated the coordination nature of these Ni-O bonds as indicated by the obvious increasing electronic localization function (ELF) value between Ni and O in Figure S6c-7d. Moreover, the introduced Ni would significantly influence the charge distribution of the atoms on CeO<sub>2</sub> (110) surface, the introduced Ni reveal the stronger Lewis acidity as indicated by the more positive Bader charge (+2.30 *e*) than Ce (+2.00 *e*), and the catalytic activity would be enhanced along with the introduction of the stronger Lewis acidity. Therefore, the single atom/site-type Ni should be the ideal active site of Ni/CeO<sub>2</sub> (110) to convert chitin to *N*-Acylethanolamine.

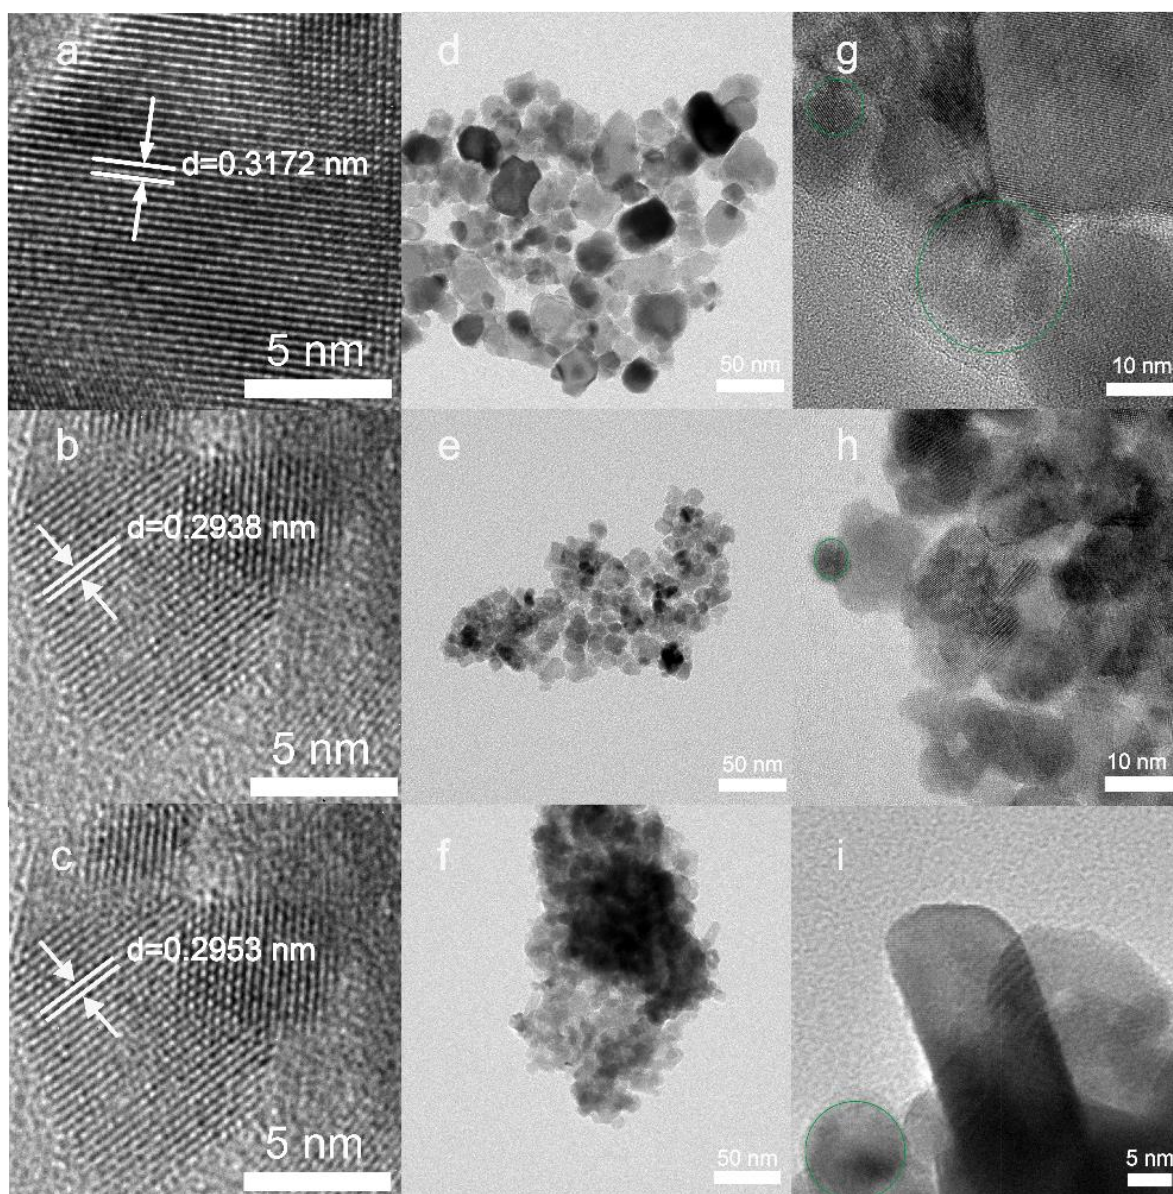

**Figure S1.** HRTEM images of standalone (a)  $\text{CeO}_2(\text{C})$ , (b)  $\text{CeO}_2(\text{P})$ , and (c)  $\text{CeO}_2(\text{R})$  supports and TEM images of three catalysts: (d, g)  $\text{Ni/CeO}_2(\text{C})$ , (e, h)  $\text{Ni/CeO}_2(\text{P})$ , and (f, i)  $\text{Ni/CeO}_2(\text{R})$ .

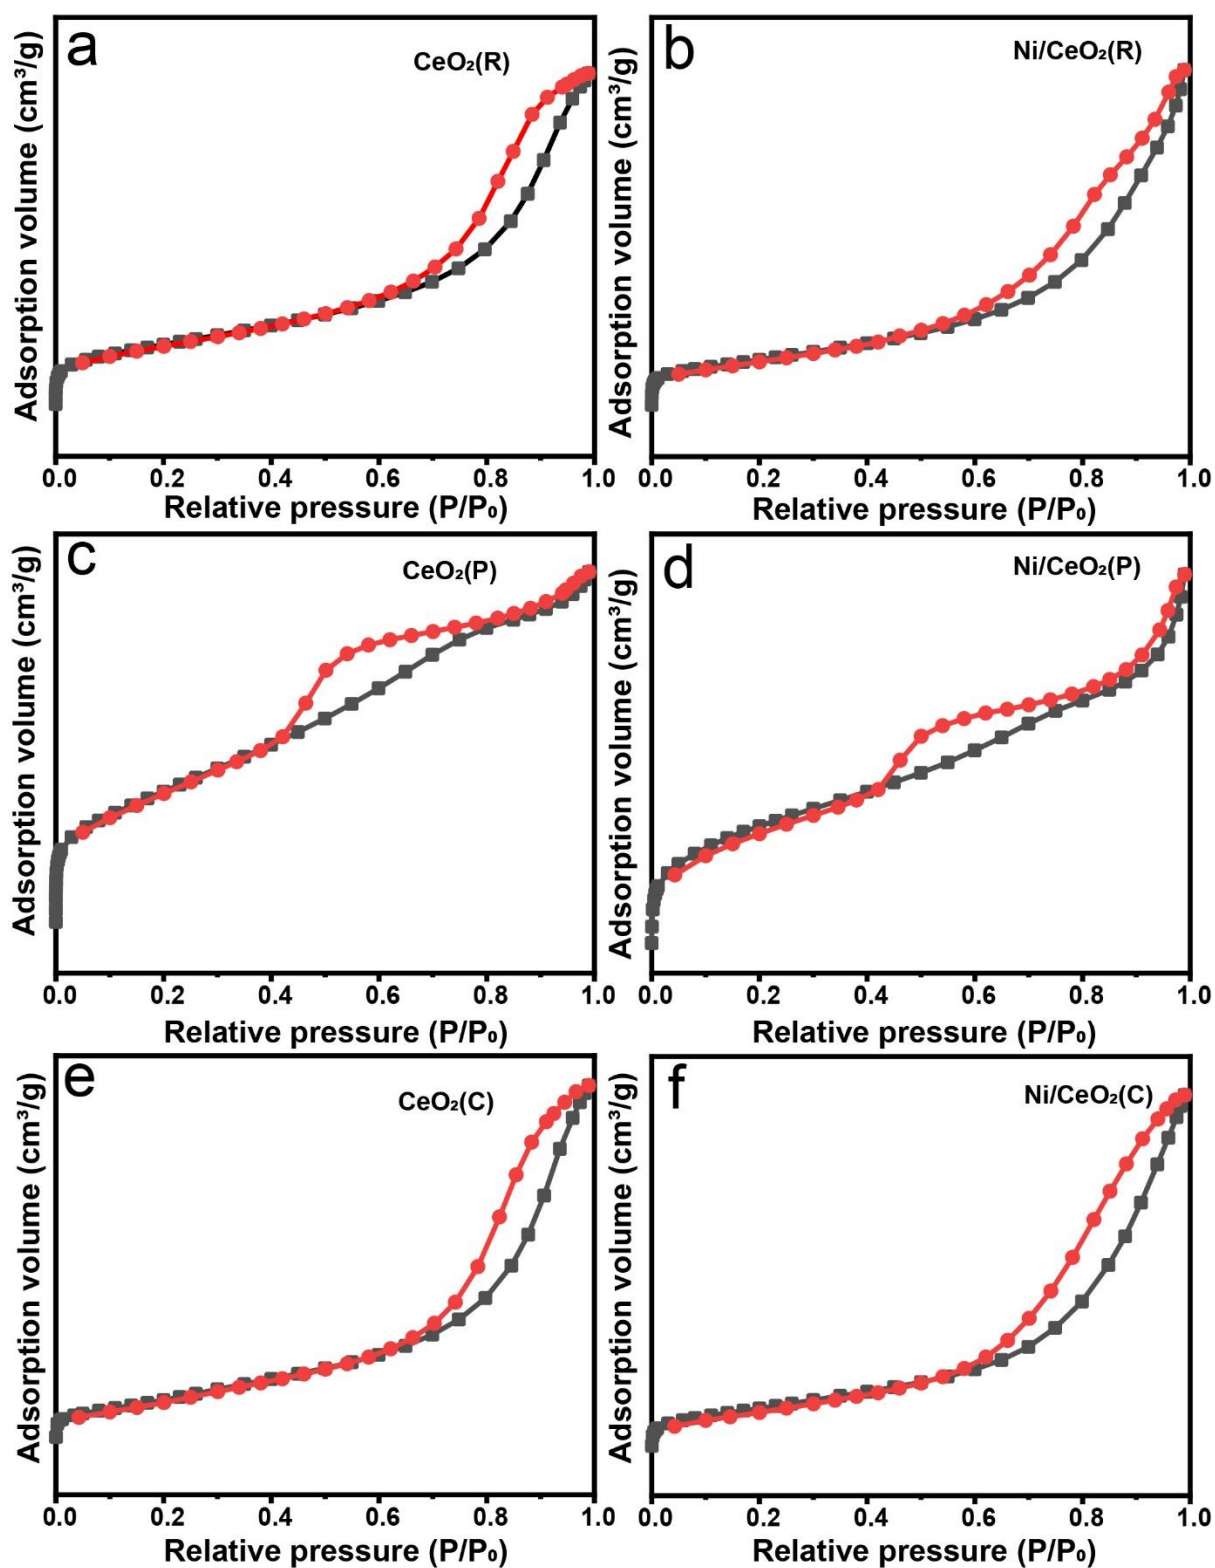

**Figure S2.** The physical adsorption spectrum of the catalyst. (a, c, e) are the BET spectra of the CeO<sub>2</sub> carrier, respectively; (b, d, f) are the BET spectra of the Ni/CeO<sub>2</sub> catalyst, respectively.

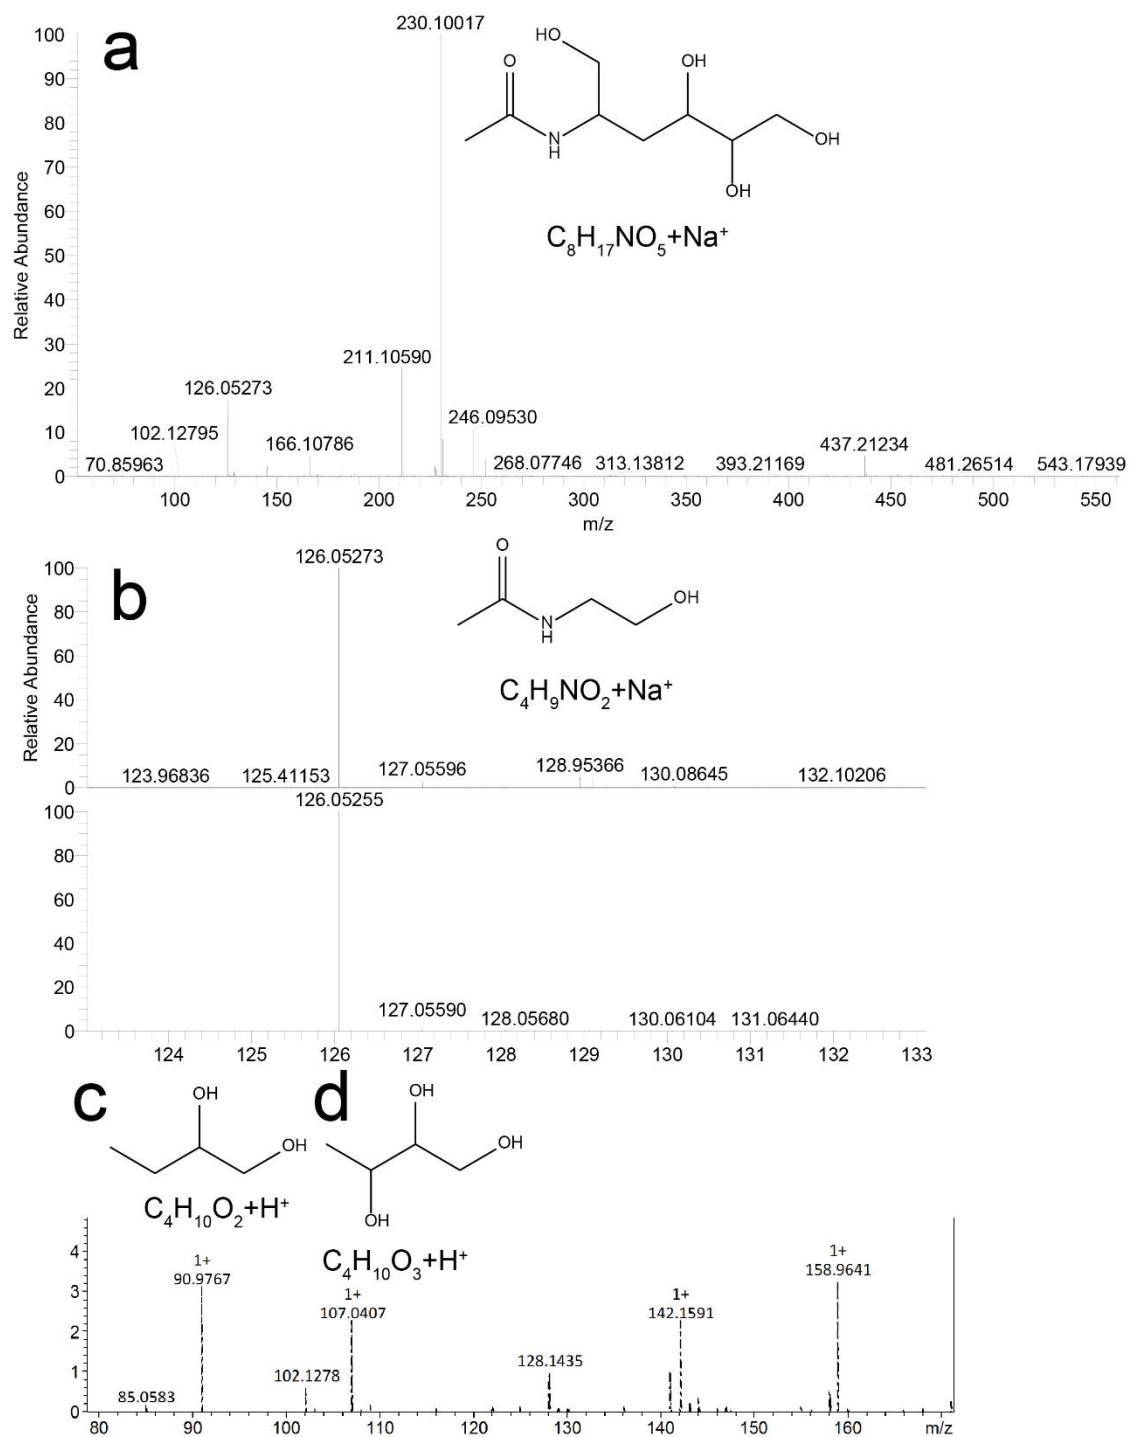

**Figure S3.** MS spectra of crude reaction mixture: (a) N-(1,4,5,6-tetrahydroxyhexan-2-

yl)acetamide, (b) *N*-acetylethanolamine, (c) butane-1,2-diol and (d) butane-1,2,3-triol.

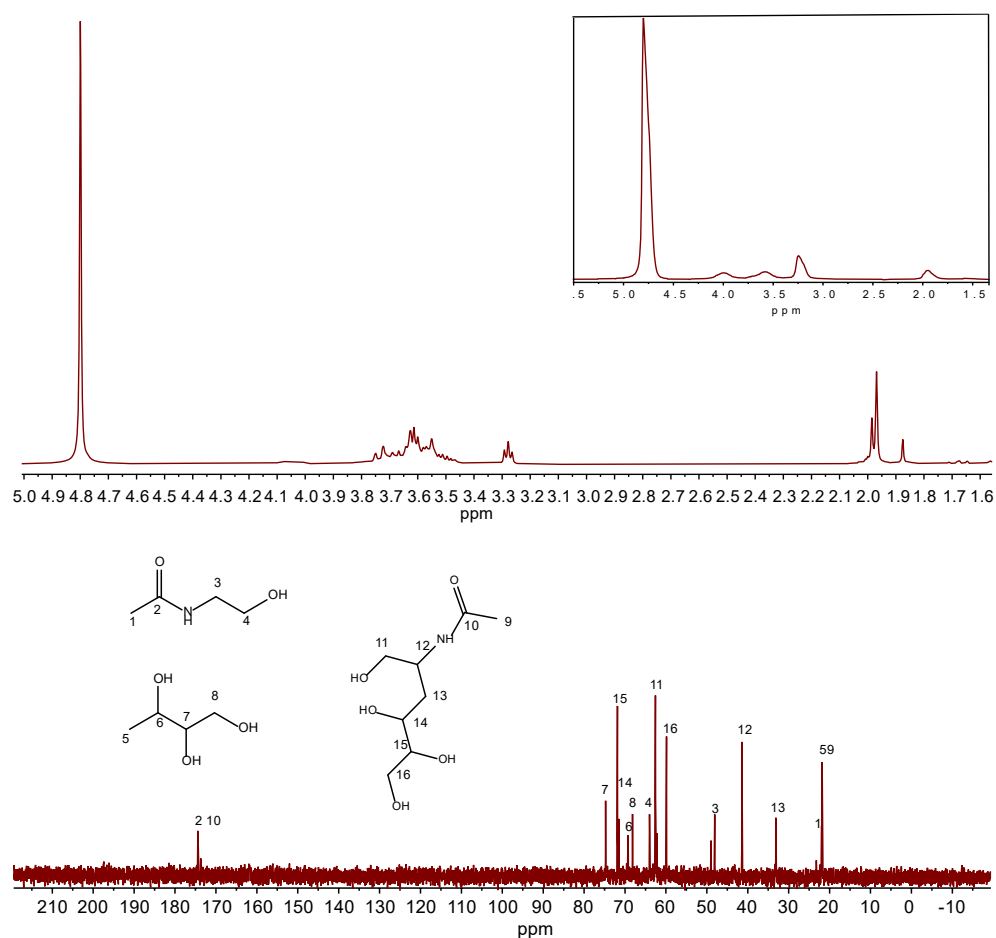

**Figure S4.** Typical  $^1\text{H}$ -NMR (top) and  $^{13}\text{C}$ -NMR (bottom) spectra of the product after the reaction (Reaction conditions: 1 g NAG, 15 mg catalyst, 5 mL  $\text{H}_2\text{O}$  solvent, 40 bar  $\text{H}_2$  pressure, 120  $^\circ\text{C}$  temperature, 6 h reaction time). The crude product was not purified. The illustration is  $^2\text{H}$ -NMR in the inset (Reaction conditions: 1 g NAG, 15 mg catalyst, 5 mL  $\text{D}_2\text{O}$  solvent, 40 bar  $\text{H}_2$  pressure), 120  $^\circ\text{C}$  temperature, 6 h reaction time).

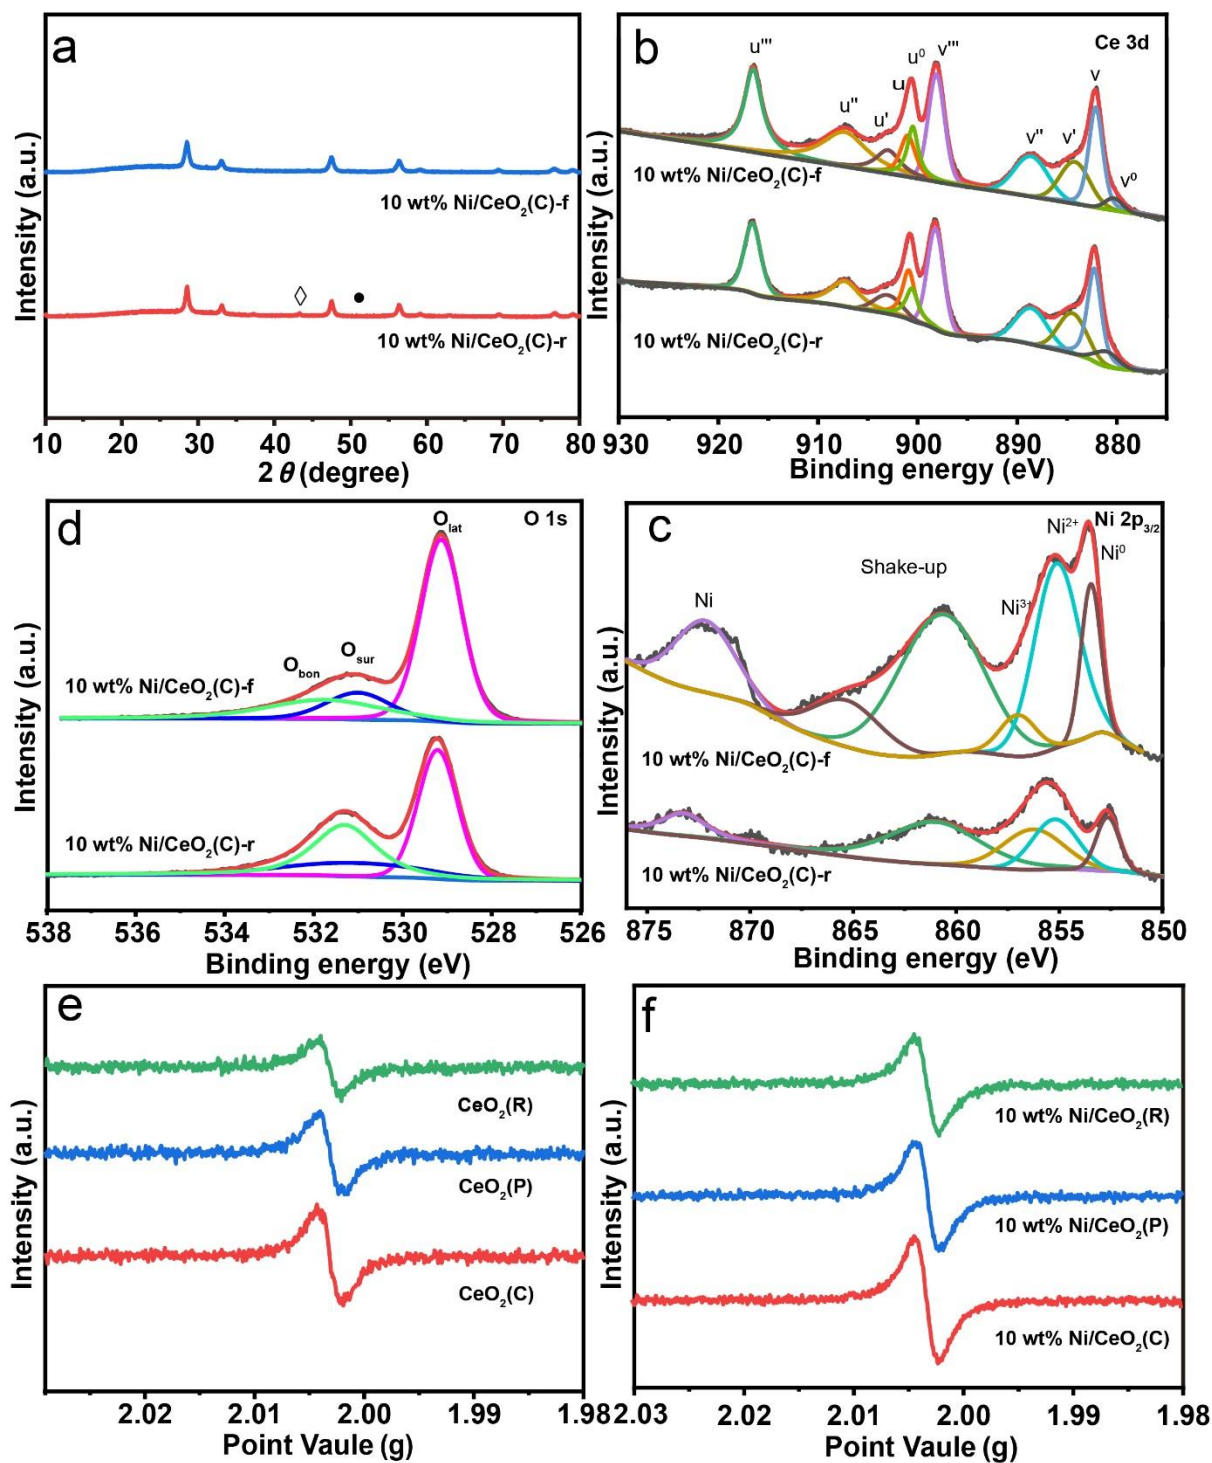

**Figure S5.** (a) XRD patterns and XPS of (b) Ce 3d, (c) O 1s, and (d) Ni 3d spectra of Ni/CeO<sub>2</sub>(C)-f, Ni/CeO<sub>2</sub>(C)-r catalytic materials.(e) and (f) EPR spectra of CeO<sub>2</sub>(R), CeO<sub>2</sub>(P), CeO<sub>2</sub>(C) and Ni/CeO<sub>2</sub>(R), Ni/CeO<sub>2</sub>(P) and Ni/CeO<sub>2</sub>(C) catalytic materials.

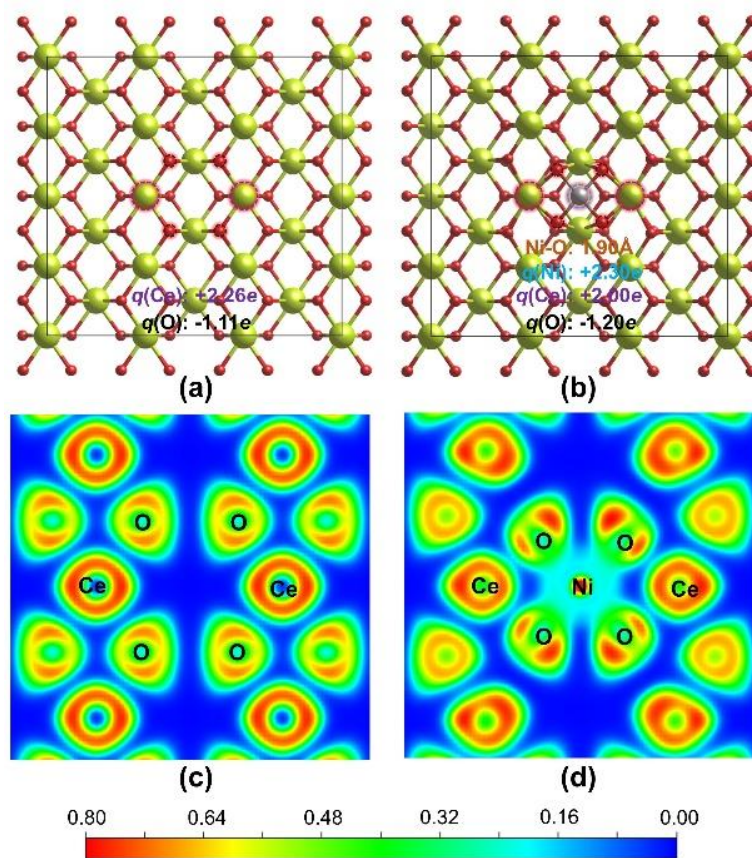

**Figure S6.** Geometrical structures of (a) CeO<sub>2</sub> (110) surface and (b) Ni assembled CeO<sub>2</sub> (110) surface. Electronic Localization Function of (a) CeO<sub>2</sub> (110) surface and (b) Ni assembled CeO<sub>2</sub> (110) surface. Atoms in Green: Ce, red: O, gray: Ni.

**Table S1.** The catalytic screening: The comparison study.

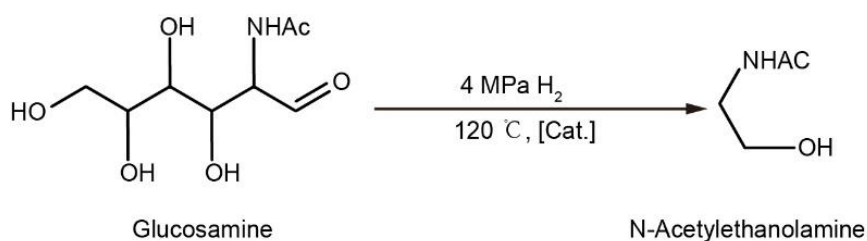

| Cat.                                        | T(h) | N-Acetylethanolamine |
|---------------------------------------------|------|----------------------|
|                                             |      | (%)                  |
| 5 wt% Ru/C                                  | 6    | 13                   |
| 5 wt% Rh/C                                  | 6    | 28                   |
| 10 wt% Pd/C                                 | 6    | 16                   |
| 5 wt% Ru/Al <sub>2</sub> O <sub>3</sub>     | 6    | 29                   |
| 5 wt% Ni/TiO <sub>2</sub>                   | 6    | 8                    |
| 10 wt% Ni/ZSM-5                             | 6    | 10                   |
| 10 wt% Ni/KIT-6                             | 6    | 5                    |
| 10 wt% Ni-4 wt% Ru/CeO <sub>2</sub>         | 6    | 39                   |
| 10 wt% Ni/SBA-15                            | 6    | 27                   |
| 10 wt% Ni/CeO <sub>2</sub> (C) <sup>a</sup> | 6    | 0                    |
| 10 wt% Ni/CeO <sub>2</sub> (C) <sup>b</sup> | 6    | 0                    |

|                                |     |    |
|--------------------------------|-----|----|
| 10 wt% Ni/CeO <sub>2</sub> (C) | 0.5 | 19 |
| 10 wt% Ni/CeO <sub>2</sub> (C) | 1   | 36 |
| 10 wt% Ni/CeO <sub>2</sub> (C) | 2   | 40 |
| 10 wt% Ni/CeO <sub>2</sub> (C) | 4   | 33 |
| 10 wt% Ni/CeO <sub>2</sub> (C) | 6   | 38 |
| 10 wt% Ni/CeO <sub>2</sub> (C) | 8   | 42 |
| 10 wt% Ni/CeO <sub>2</sub> (R) | 0.5 | 14 |
| 10 wt% Ni/CeO <sub>2</sub> (R) | 1   | 12 |
| 10 wt% Ni/CeO <sub>2</sub> (R) | 2   | 14 |
| 10 wt% Ni/CeO <sub>2</sub> (R) | 4   | 14 |
| 10 wt% Ni/CeO <sub>2</sub> (R) | 6   | 42 |
| 10 wt% Ni/CeO <sub>2</sub> (R) | 8   | 34 |
| 10 wt% Ni/CeO <sub>2</sub> (P) | 0.5 | 25 |
| 10 wt% Ni/CeO <sub>2</sub> (P) | 1   | 26 |
| 10 wt% Ni/CeO <sub>2</sub> (P) | 2   | 27 |
| 10 wt% Ni/CeO <sub>2</sub> (P) | 4   | 29 |
| 10 wt% Ni/CeO <sub>2</sub> (P) | 6   | 38 |
| 10 wt% Ni/CeO <sub>2</sub> (P) | 8   | 23 |

---

Condition: <sup>a</sup> is 1 bar N<sub>2</sub>, <sup>b</sup> is 1 bar air, the yield is quantified by NMR.

**Table S2.** The representative comparison of catalytic performance of the conversion of *N*-acetylglucosamine to different target products over different catalysts.

| Catalyst | Product                                 | Yield (%) | Reaction conditions                                    | Ref. |
|----------|-----------------------------------------|-----------|--------------------------------------------------------|------|
| Ru/C     | <i>N</i> -acetylmonoethanolamine (AMEA) | 29        | H <sub>2</sub> (4 MPa), NaHCO <sub>3</sub> , 393K, 1 h | [1]  |

|                                                        |                                 |      |                                                                                                                             |           |
|--------------------------------------------------------|---------------------------------|------|-----------------------------------------------------------------------------------------------------------------------------|-----------|
| Ru/C                                                   | Acetylglycine (AcGly)           | 22   | 1. H <sub>2</sub> (4 MPa),<br>NaHCO <sub>3</sub> , 393K, 1 h<br>2. O <sub>2</sub> (1MPa),<br>NaHCO <sub>3</sub> , 393K, 1 h | [1]       |
| V <sub>2</sub> O <sub>5</sub>                          | Acetic acid                     | 33.4 | O <sub>2</sub> (0.5 MPa), 2 h,<br>493K                                                                                      | [2]       |
| [Pyz]Cl                                                | 3-acetylamino-5-acetylfuran     | 36.9 | 463K, 1 h                                                                                                                   | [3]       |
| H <sub>2</sub> SO <sub>4</sub>                         | levulinic acid                  | 20.6 | 463K, 10 min                                                                                                                | [4]       |
| 1-methyl-3-(3-sulfopropyl)imidazolium hydrogen sulfate | levulinic acid                  | 67   | 180 °C, 5 h, 1 g<br>[C <sub>3</sub> SO <sub>3</sub> Hmim]HSO <sub>4</sub> , 6 g of H <sub>2</sub> O                         | [5]       |
| Ni/CeO <sub>2</sub>                                    | N-acetylmonoethanolamine (AMEA) | 42   | H <sub>2</sub> (4 MPa),<br>NaHCO <sub>3</sub> , 393K, 6 h                                                                   | This work |

**Table S3.** Several CeO<sub>2</sub> sample conditions.

| Entry | m NaOH (g) | T (°C) | Shape                |
|-------|------------|--------|----------------------|
| 1     | 0.96       | 100    | CeO <sub>2</sub> (R) |
| 2     | 0.016      | 100    | CeO <sub>2</sub> (P) |
| 3     | 0.96       | 180    | CeO <sub>2</sub> (C) |

## References

1. Techikawara, K.; Kobayashi, H.; Fukuoka, A. Conversion of *N*-Acetylglucosamine to Protected Amino Acid over Ru/C Catalyst. *ACS Sustain. Chem. Eng.* **2018**, *6*, 12411–12418.
2. Qi, M.; Chen, X.; Zhong, H.; Wu, J.; Jin, F. Base-Free, Vanadium-Catalyzed Conversion of Chitin into Acetic Acid under Low Oxygen Pressure. *ACS Sustain. Chem. Eng.* **2020**, *8*, 18661–18670.
3. Du, Y.; Zang, H.; Feng, Y.; Wang, K.; Lv, Y.; Liu, Z. Efficient catalytic system for converting *N*-acetyl-d-glucosamine into valuable chemical 3-acetylamino-5-acetylfuran. *J. Mol. Liq.* **2022**, *347*, 117970.
4. Szabolcs, Á.; Molnár, M.; Dibó, G.; Mika, L. T. Microwave-assisted conversion of carbohydrates to levulinic acid: an essential step in biomass conversion. *Green Chem.* **2013**, *15*, 439–445.
5. Hou, W.; Zhao, Q.; Liu, L. Selective conversion of chitin to levulinic acid catalyzed by ionic liquids: distinctive effect of *N*-acetyl groups. *Green Chem.* **2020**, *22*, 62–70.
